# Supplementary material for: Engineering Iron Oxide Nanocatalysts by a Microwave-Assisted Polyol Method for the Magnetically Induced Degradation of Organic Pollutants
Source: MDPI journal article supplement (doi:10.3390/nano11041052), 2021-04-20
Supplement: s1 [file s1]

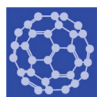

## Supporting Information

Article

# Engineering Iron Oxide Nanocatalysts by a Microwave-Assisted Polyol Method for the Magnetically Induced Degradation of Organic Pollutants

Alvaro Gallo-Cordova <sup>1,\*</sup>, Sabino Veintemillas-Verdaguer <sup>1</sup>, Pedro Tartaj <sup>1</sup>, Eva Mazarío <sup>2</sup>,  
María del Puerto Morales <sup>1</sup> and Jesús G. Ovejero <sup>1,\*</sup>

<sup>1</sup> Instituto de Ciencia de Materiales de Madrid, ICMM/CSIC, C/Sor Juana Inés de la Cruz 3, 28049 Madrid, Spain; sabino@icmm.csic.es (S.V.V.); ptartaj@icmm.csic.es (P.T.); puerto@icmm.csic.es (M.P.M.)

<sup>2</sup> Departamento de Química Física Aplicada, Facultad de Ciencias, Universidad Autónoma de Madrid, C/Francisco Tomás y Valiente, 7, Cantoblanco, 28049 Madrid, Spain; eva.mazario@uam.es

\* Correspondence: alvaro.gallo@csic.es (A.G.C.); jesus.g.ovejero@csic.es (J.G.O.); Tel.: +34 913 349 000 ext. 131268 (A.G.C. and J.G.O.)

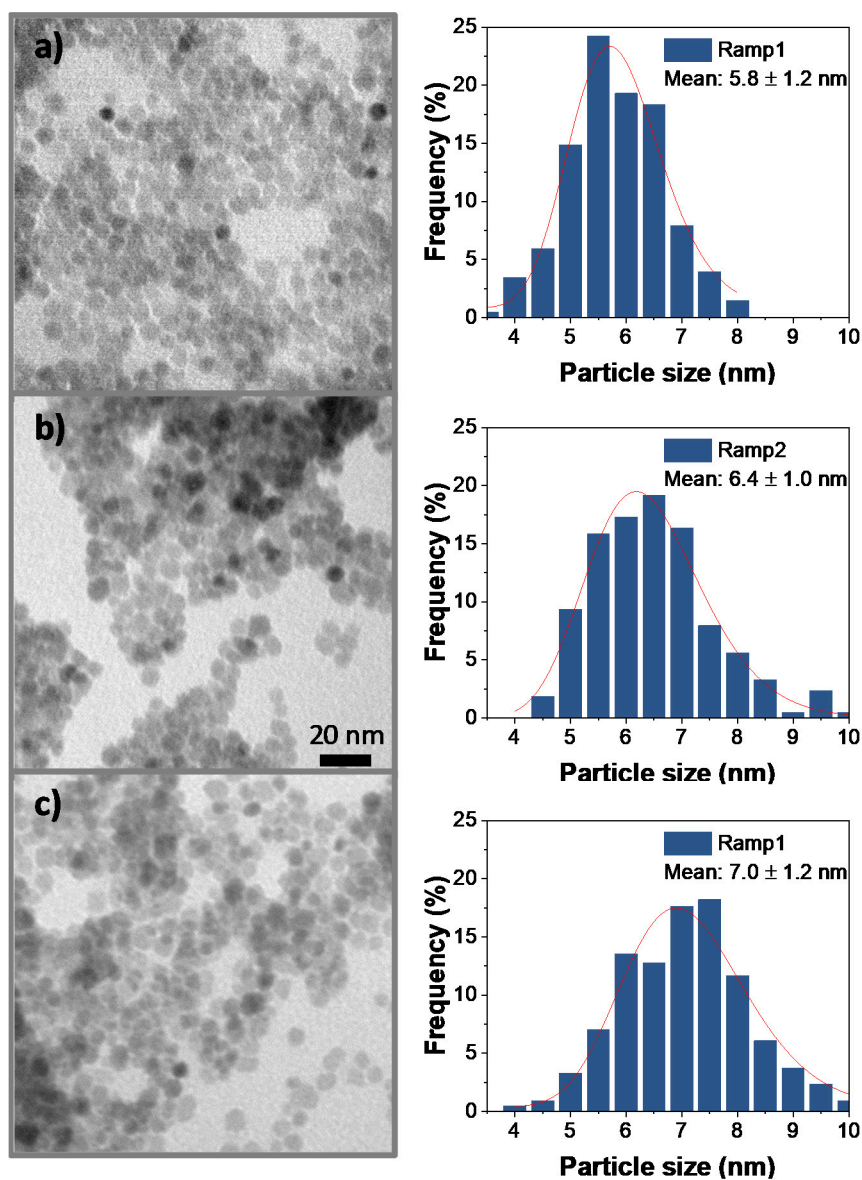

**Figure S1.** TEM micrographs with their respective particle size distribution of a) Ramp1 (3.75 °C/min), b) Ramp2 (7.3 °C/min) and c) Ramp3 (14.6 °C/min).

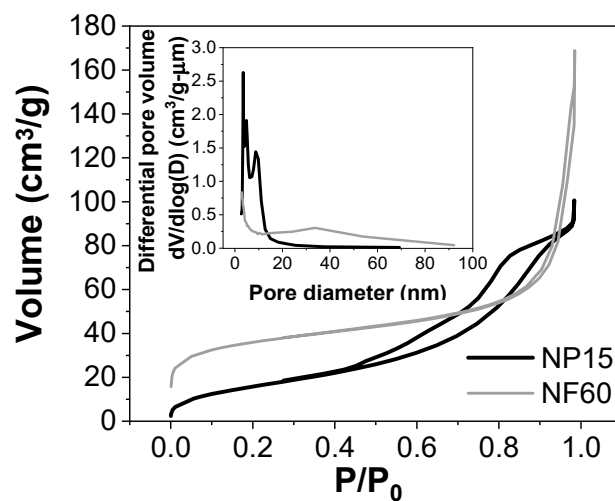

**Figure S2** N<sub>2</sub> adsorption-desorption isotherms of NP15 and NF60. Inset: pore size distribution.

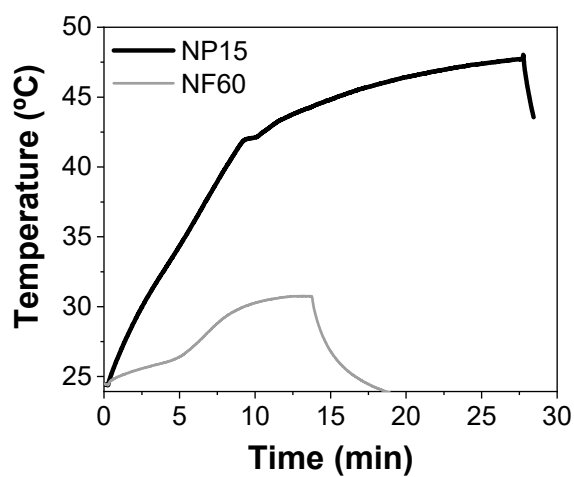

**Figure S3** Temperature curves obtained at 16 kA/m, 200 kHz and 1 g/L of NP15 and NF60.

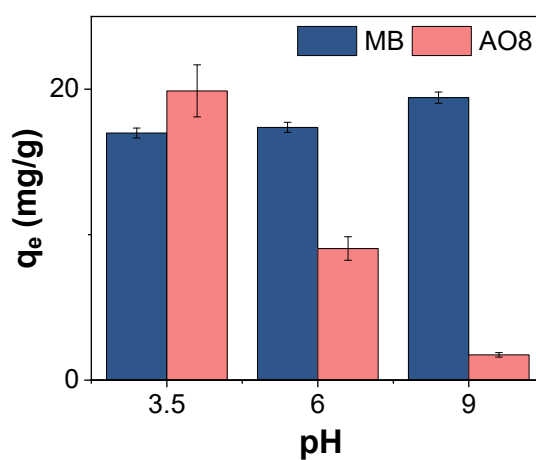

**Figure S4** Adsorption capacities of AO8 and MB over NP15 at different pH values (10 mg of NP15, 10 mL of AO8 500 ppm, 2 h).
